# Supplementary material
Source: HighWire-hosted journal article supplement (http://www.qdcxjkg.com/highwire/filestream/114062/field_highwire_adjunct_files/0/ERJ-01844-2012_Disclosures.pdf)
Supplement: ERJ-01844-2012_Disclosures.pdf [file ERJ-01844-2012_Disclosures.pdf]

**A. Boonstra** has received fees for consulting and speaking from United Therapeutics and Sun Pharma.

**A. Vonk Noordegraaf** has received fees for consulting and speaking from United Therapeutics, Bayer, Novartis, Actelion, GlaxoSmithKline, Pfizer, and Lilly.
